# Supplementary material for: Cognitive Function Related to the Sirh11/Zcchc16 Gene Acquired from an LTR Retrotransposon in Eutherians
Source: PubMed Central journal article supplement (PMC4581854; doi:10.1371/journal.pgen.1005521), 2015-09-24
Supplement: pgen.1005521.s001.pdf [file pgen.1005521.s001.pdf]

Armadillo 1 IEKYTESPST-LQLEHFSIWxENLIL\*PQVRHQIEENIAPSSQVLPVLATPMPVPFSL  
Armadillo 2 IKKYAKSPRYLCxLEHFSILAENLILQP\*AQHLIEETVAPSSQVLPALATSMMPVPFLLE  
FloridaManatee MEKFTESPPT-LQVEHSSLWADDLILEPQVQHLTDDSTALRGQVMPPTLATPMPVSCSLE  
::\*::\*\* : \*\* \* : : \*\* \* : \* : : \* : \* : \* : \* : \* : \* : \*

Armadillo 1 HLTQFHDDHAHFSV-GIPGTTYLTVLKIPSPTDDVQVKLFLITYLRS\*RVVGTYLDLTxE  
Armadillo 2 HHTQFHDDPANFSV-GSQGTTYLTALKIPNPTDDVQVKFFDYLSQQMKSCGVLSGPNQx  
FloridaManatee HPSQFHVDPANLSGFLAQATTYLTALKTPNPADDVQVKFFDYISQQVERCRILPGSD-Q  
\* : \*\* \* \* : \* : \* : \* : \* : \* : \* : \* : \* : \* : \* : \* : \* : \*

Armadillo 1 SILVKQYVNFILDFHQSGFKPKP\*EMFHLVSTKIDKGDDSSLOQVTFSS--SLLKI\*NH  
Armadillo 2 STLLKQYENFILEFQESFGKLTQEMSPVSSKIDKGDEFSLQYISTFQFHAQNLKLL\*K  
FloridaManatee STLLKQYENFVSEFQSSFGPTKQEMNPLVNAKLDKGNDSFQYATTFQLLAENISCNKT  
\* : \* : \* : \* : \* : \* : \* : \* : \* : \* : \* : \* : \* : \* : \* : \*

Armadillo 1 YEKSVLRGTGWSNL\*QN---EWYTFGQLPDLIIQCIQLNKKHSDRPQLLHSEIQLPQLTF  
Armadillo 2 ISSERYRV--VQFVMK\*---xRHKFGOPDLITQCIQLDKKHSRPELLNAEAQLPRLTF  
FloridaManatee ILSQQLQE-GLADPIQDEVSGTDMENLPLITQCIQLDRKRSRPELLQSEAQLPRLAS  
.. : : : : \* : \* : \* : \* : \* : \* : \* : \* : \* : \* : \* : \*

Armadillo 1 LIYHQYFSSPTSTPPKE-----  
Armadillo 2 LLYHQYFSSPTSTPPKEETI\*LWGGQLPLTTAK\*VCQETQLYSHCSKADQFTRDCFAKH  
FloridaManatee LVHHQYLSPTGPPAKEEPTQLRGGQLPLTPAKRARQETQFCLYCSQPGHFTKDCLAKR  
\* : \* : \* : \* : \* : \* : \* : \* : \* : \* : \* : \* : \* : \* : \* : \*

Armadillo 1 -----  
Armadillo 2 S\*ASAKPNN\*AH\*Q  
FloridaManatee SRAPARSNNPTHQ

Sloth 1 MEKYTESPPLPVEHF\*LQAENLILQPVQHLNEENTSPSG\*VLPALVTPMMPPIPFSL  
Sloth 2 MEKYTESPPLPVEHF\*LQAENLILQPVQHLNEENTSPSG\*VLAALVTPMMPPIPFSL  
FloridaManatee MEKFTESPPTLQVEHSSLWADDLILEPQVQHLTDDSTALRGQVMPPTLATPMPVSCSLEH  
\*\* : \* : \* : \* : \* : \* : \* : \* : \* : \* : \* : \* : \* : \* : \* : \*

Sloth 1 LTQFHVDPANFSVG-SQVTTYLTSLKTALNSVDNSQVKSFSQVLSQQMKSCGVLSPD\*S  
Sloth 2 LTQFHVDPANFSVG-SQVTTYLTSLKTALNSVDNSQVKSFSQVLSQQMKSCGVLSPD\*S  
FloridaManatee PSQFHVDPANLSGFLAQATTYLTALKT-PNPADDVQVKFFDYISQQVERCRILPGSDQS  
: \* : \* : \* : \* : \* : \* : \* : \* : \* : \* : \* : \* : \* : \* : \*

Sloth 1 TLLKQYENFIPEYQSSFGKPTKQEMNPVNAKVDKGNDSLPLCYHFQFLAQNLSYNETT  
Sloth 2 TLLKQYENFIPEYQSSFGKPTKQEMNPVNAKVDKGNDSLPLCYHFQFLAQNLSYNETT  
FloridaManatee TLLKQYENFVSEFQSSFGPTKQEMNPLVNAKLDKGNDSFQYATTFQLLAENISCNKTI  
\* : \* : \* : \* : \* : \* : \* : \* : \* : \* : \* : \* : \* : \* : \* : \*

Sloth 1 M\*DPLQEGLAGPVCEMSGKN-MDNPPDLITRCIKLDKMKxSDGPELLQSEVQLPRSTSL  
Sloth 2 M\*DPLREGLAGPVCEMSGKN-MDNPPDLITRCIKLDKMKxNDGPELLQSEVQLPRSTSL  
FloridaManatee LSDQLQEGLAGPIQDEVSGTDMENLPLITQCIQLDRK-RSDRPELLQSEAQLPRLASL  
: \* : \* : \* : \* : \* : \* : \* : \* : \* : \* : \* : \* : \* : \* : \*

Sloth 1 IYHQYLSSTTGTLPEKPV\*LQEGQLLLTTAKxAHQQUET\*FCSYCSQADHFTRDCLTKHS  
Sloth 2 IYHQYLSSTTGTLPEKPV\*LQEGQVLLTTGKxAHQQUET\*FCSYCSQADHFTRDCLTKHS  
FloridaManatee VHHQYLSSTGPPAKEEPTQLRGGQLPLTPAKRARQETQFCLYCSQPGHFTKDCLAKRS  
: \* : \* : \* : \* : \* : \* : \* : \* : \* : \* : \* : \* : \* : \* : \*

Sloth 1 RPAKTNNPACQ  
Sloth 2 RPAKTNNPACQ  
FloridaManatee RAPARSNNPTHQ  
\* : \* : \* : \* : \*
