# Supplementary material for: Cognitive Function Related to the Sirh11/Zcchc16 Gene Acquired from an LTR Retrotransposon in Eutherians
Source: PubMed Central journal article supplement (PMC4581854; doi:10.1371/journal.pgen.1005521), 2015-09-24

### Bilirubin

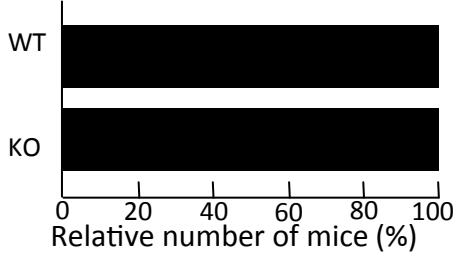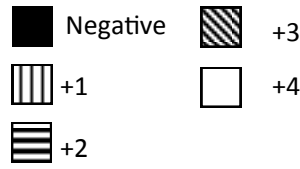

### Glucose

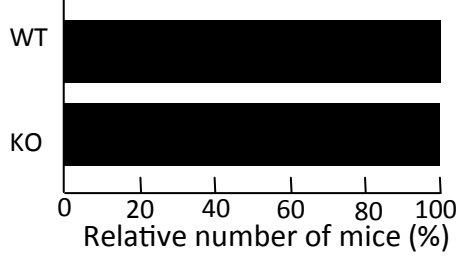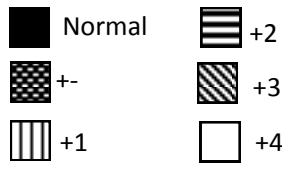

### Ketone body

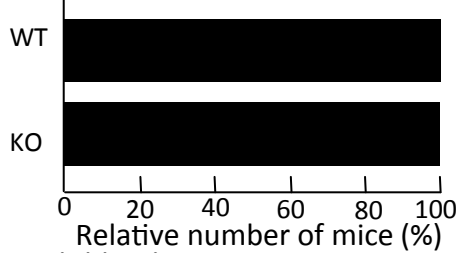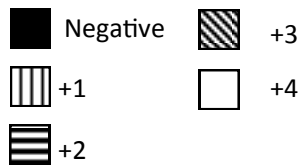

### Occult blood

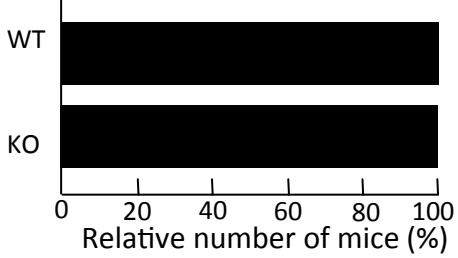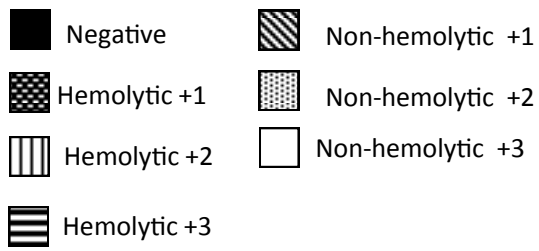

### Urine protein

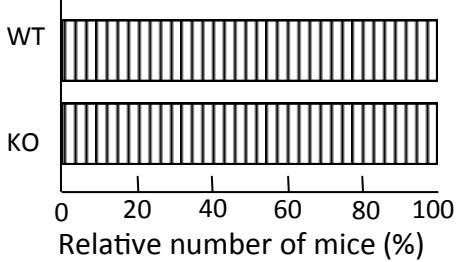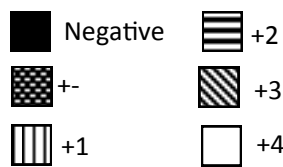

### Urobilinogen

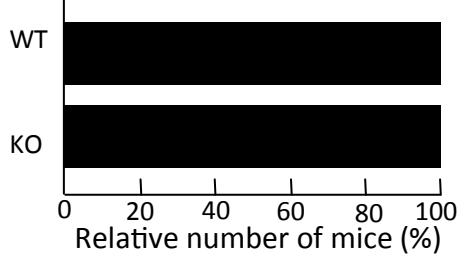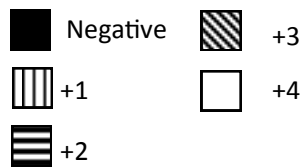

### pH

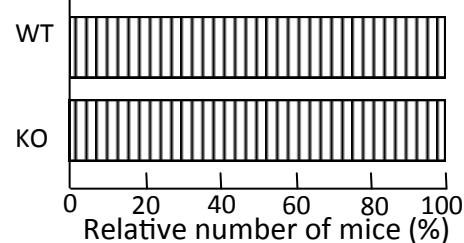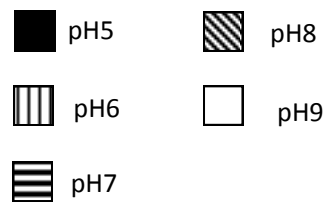

Supplement: pgen.1005521.s003.pdf [file pgen.1005521.s003.pdf]
