# Supplementary material for: Cognitive Function Related to the Sirh11/Zcchc16 Gene Acquired from an LTR Retrotransposon in Eutherians
Source: PubMed Central journal article supplement (PMC4581854; doi:10.1371/journal.pgen.1005521), 2015-09-24
Supplement: pgen.1005521.s004.pdf [file pgen.1005521.s004.pdf]

WT

KO

8 w

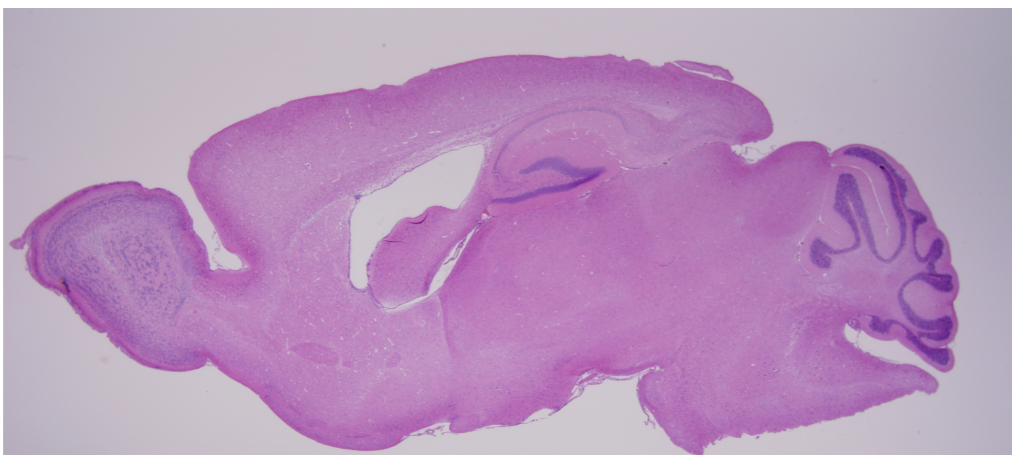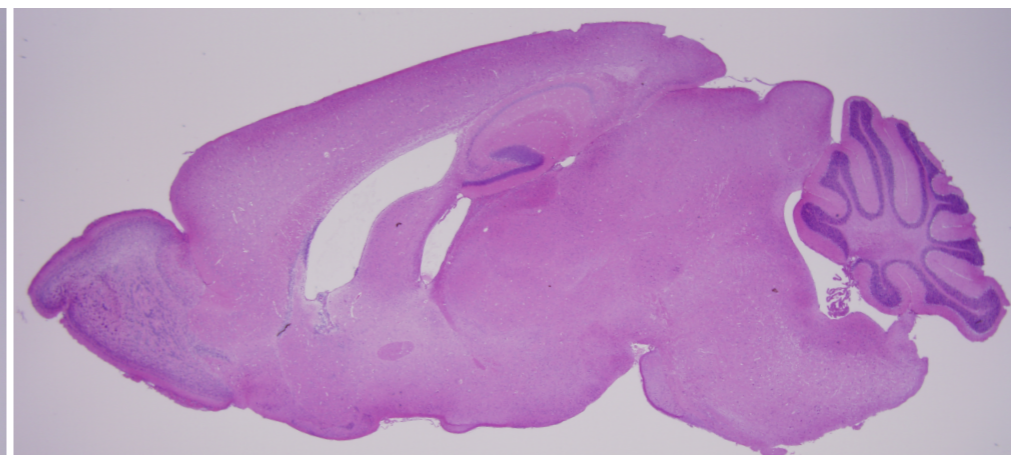

12 w

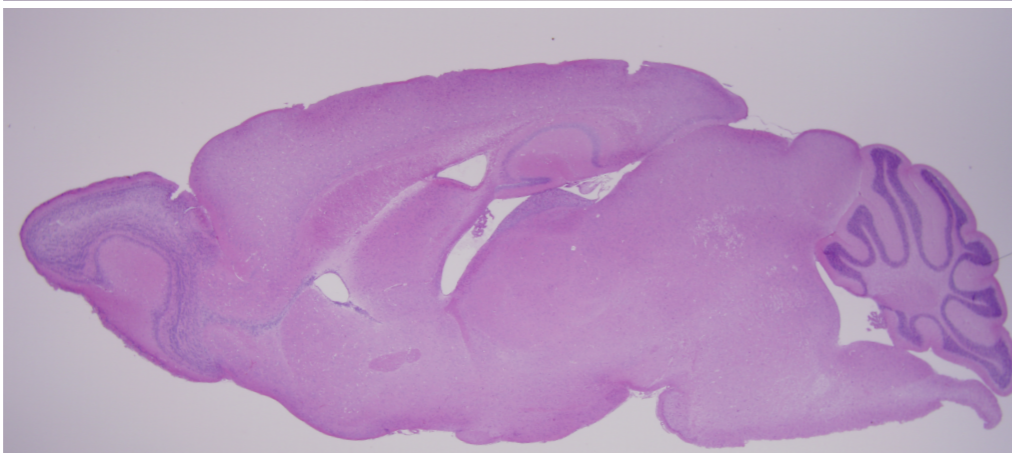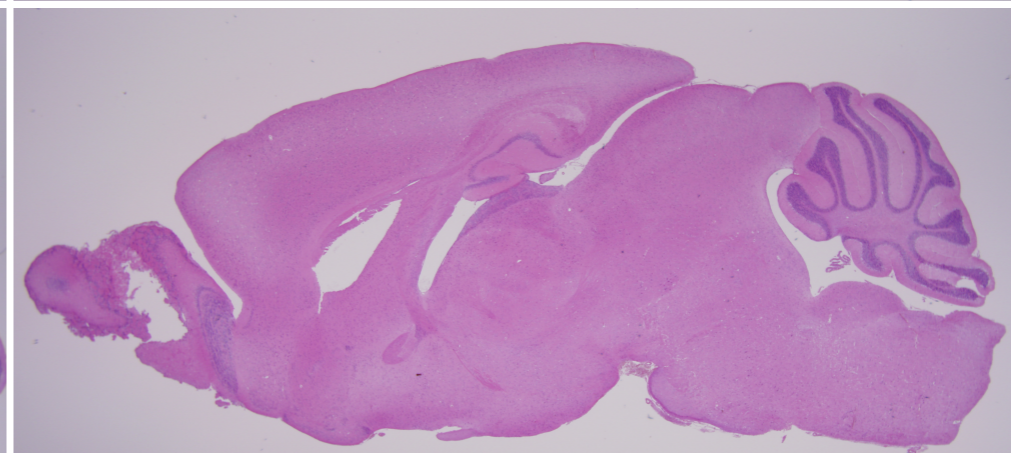

16 w

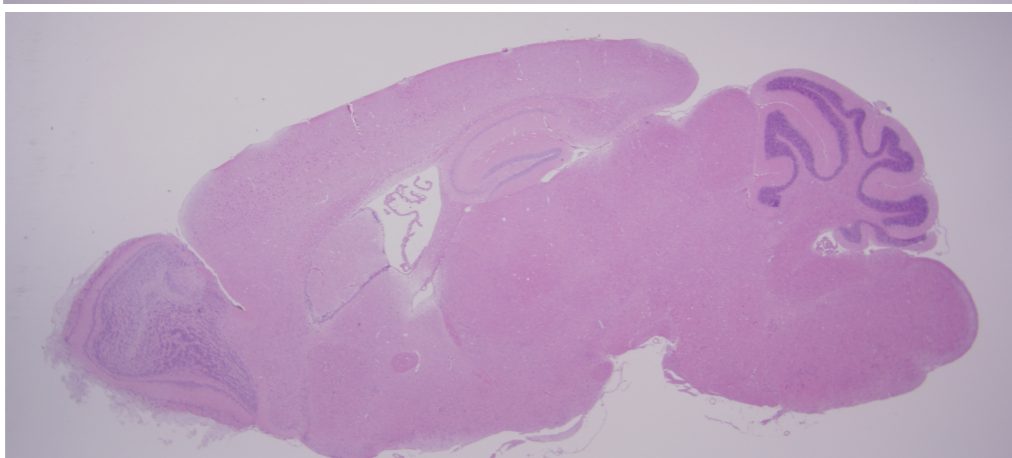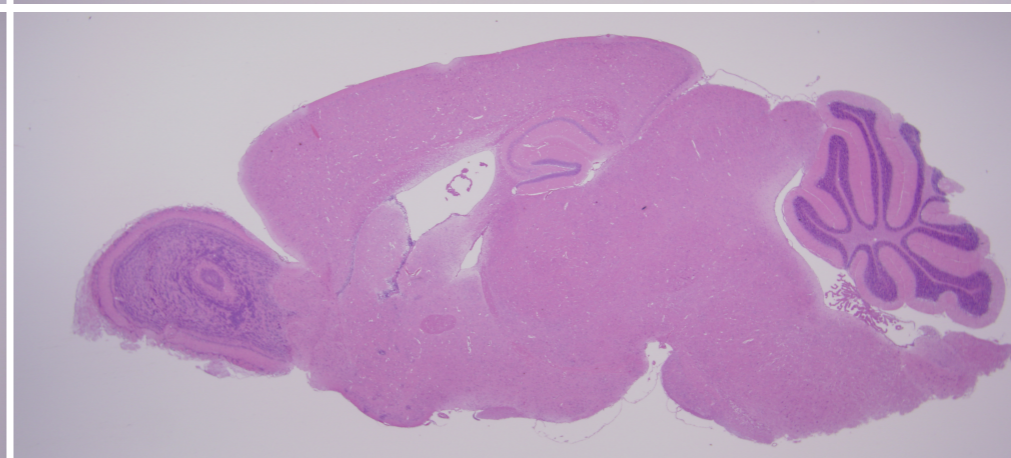

1.0 mm
